# Supplementary material for: ComFC mediates transport and handling of single-stranded DNA during natural transformation
Source: PubMed Central journal article supplement (PMC9005727; doi:10.1038/s41467-022-29494-z), 2022-04-12
Supplement: 41467_2022_29494_MOESM4_ESM.pdf [file 41467_2022_29494_MOESM4_ESM.pdf]

**Title: Supplementary Movie 1**

**Description:** Movie showing the internalisation of fluorescent tDNA into a *wild-type* bacteria. The movie is representative of 26 bacteria analysed.

**Title: Supplementary Movie 2**

**Description:** Movie showing the internalisation of fluorescent tDNA into a  $\Delta comEC$  bacteria. The movie is representative of 25 bacteria analysed.

**Title: Supplementary Movie 3**

**Description:** Movie showing the internalisation of fluorescent tDNA into a  $\Delta comFC$  bacteria. The movie is representative of 148 bacteria analysed.
